# Supplementary material for: The Prevalence, Characteristics and Risk Factors of Persistent Symptoms in Non-Hospitalized and Hospitalized Children with SARS-CoV-2 Infection Followed-Up for up to 12 Months: A Prospective, Cohort Study in Rome, Italy
Source: MDPI journal article supplement (doi:10.3390/jcm11226772), 2022-11-16
Supplement: s1 [file s1]

### Supplementary material

| Symptom                                    | All observations | By period                          |                                    |                                          |                      | By sex                       |                            |                      | By age group                         |                                          |                      |
|--------------------------------------------|------------------|------------------------------------|------------------------------------|------------------------------------------|----------------------|------------------------------|----------------------------|----------------------|--------------------------------------|------------------------------------------|----------------------|
| N = 679 <sup>1</sup>                       |                  | 1 - 5 months, N = 355 <sup>1</sup> | 6 - 9 months, N = 157 <sup>1</sup> | 12 months and more, N = 154 <sup>1</sup> | p-value <sup>2</sup> | female, N = 344 <sup>1</sup> | male, N = 330 <sup>1</sup> | p-value <sup>2</sup> | below 10 years, N = 317 <sup>1</sup> | 10 years and above, N = 359 <sup>1</sup> | p-value <sup>2</sup> |
| Number of symptoms reported                |                  |                                    |                                    |                                          | 0.024                |                              |                            | 0.7                  |                                      |                                          | <0.001               |
| No persisting symptoms reported            | 352 (52%)        | 164 (46%)                          | 88 (56%)                           | 97 (63%)                                 |                      | 172 (50%)                    | 178 (54%)                  |                      | 194 (61%)                            | 157 (44%)                                |                      |
| Only one persisting symptom reported       | 160 (24%)        | 95 (27%)                           | 32 (20%)                           | 30 (19%)                                 |                      | 83 (24%)                     | 74 (22%)                   |                      | 78 (25%)                             | 81 (23%)                                 |                      |
| Two persisting symptoms reported           | 60 (8.8%)        | 32 (9.0%)                          | 15 (9.6%)                          | 11 (7.1%)                                |                      | 30 (8.7%)                    | 30 (9.1%)                  |                      | 20 (6.3%)                            | 39 (11%)                                 |                      |
| Three or more persisting symptoms reported | 107 (16%)        | 64 (18%)                           | 22 (14%)                           | 16 (10%)                                 |                      | 59 (17%)                     | 48 (15%)                   |                      | 25 (7.9%)                            | 82 (23%)                                 |                      |
| <sup>1</sup> n (%)                         |                  |                                    |                                    |                                          |                      |                              |                            |                      |                                      |                                          |                      |
| <sup>2</sup> Pearson's Chi-squared test    |                  |                                    |                                    |                                          |                      |                              |                            |                      |                                      |                                          |                      |

Supplementary table S1. Number of persisting symptoms according to time of follow-up, gender and age.

| Population_category                              | 1-4        | 5-7          | 8-10          |
|--------------------------------------------------|------------|--------------|---------------|
| 1 - 5 months / female / 10 years and above       | 3 ( 3.5% ) | 12 ( 14.0% ) | 71 ( 82.6% )  |
| 1 - 5 months / female / below 10 years           |            | 7 ( 7.5% )   | 86 ( 92.5% )  |
| 1 - 5 months / male / 10 years and above         | 7 ( 9.5% ) | 9 ( 12.2% )  | 58 ( 78.4% )  |
| 1 - 5 months / male / below 10 years             | 3 ( 3.2% ) | 17 ( 18.3% ) | 73 ( 78.5% )  |
| 6 - 9 months / female / 10 years and above       |            | 4 ( 9.1% )   | 40 ( 90.9% )  |
| 6 - 9 months / female / below 10 years           |            |              | 30 ( 100.0% ) |
| 6 - 9 months / male / 10 years and above         | 2 ( 4.5% ) | 1 ( 2.3% )   | 41 ( 93.2% )  |
| 6 - 9 months / male / below 10 years             |            | 2 ( 6.2% )   | 30 ( 93.8% )  |
| 12 months and more / female / 10 years and above |            | 8 ( 16.0% )  | 42 ( 84.0% )  |
| 12 months and more / female / below 10 years     |            | 2 ( 6.7% )   | 28 ( 93.3% )  |
| 12 months and more / male / 10 years and above   | 1 ( 2.4% ) | 4 ( 9.8% )   | 36 ( 87.8% )  |
| 12 months and more / male / below 10 years       |            | 1 ( 3.6% )   | 27 ( 96.4% )  |

**Table S2.** Details of recovery rates according to age and sex and follow-up.

| Characteristic  | Omicron, N = 120 <sup>1</sup> | unspecified, N = 201 <sup>1</sup> | p-value <sup>2</sup> |
|-----------------|-------------------------------|-----------------------------------|----------------------|
| Fully recovered |                               |                                   | 0.12                 |
| 1-4             | 3 (2.5%)                      | 9 (4.6%)                          |                      |
| 5-7             | 19 (16%)                      | 17 (8.7%)                         |                      |
| 8-10            | 97 (82%)                      | 169 (87%)                         |                      |

<sup>1</sup>n (%)

<sup>2</sup>Fisher's exact test

**Table S3.** Recovery rate comparing Omicron and wild virus

| Characteristic                       | All observations     | By period                             |                                       |                                                |                      | By sex                          |                               |                      | By age group                               |                                                |                      |
|--------------------------------------|----------------------|---------------------------------------|---------------------------------------|------------------------------------------------|----------------------|---------------------------------|-------------------------------|----------------------|--------------------------------------------|------------------------------------------------|----------------------|
|                                      | N = 658 <sup>1</sup> | 1 - 5 months,<br>N = 353 <sup>1</sup> | 6 - 9 months,<br>N = 154 <sup>1</sup> | 12 months<br>and more, N<br>= 151 <sup>1</sup> | p-value <sup>2</sup> | female, N =<br>337 <sup>1</sup> | male, N =<br>321 <sup>1</sup> | p-value <sup>2</sup> | below 10<br>years, N =<br>310 <sup>1</sup> | 10 years<br>and above,<br>N = 348 <sup>1</sup> | p-value <sup>2</sup> |
| Tiredness                            | 64 / 304 (21%)       | 41 / 156<br>(26%)                     | 6 / 22 (27%)                          | 17 / 126<br>(13%)                              | 0.025                | 25 / 153<br>(16%)               | 39 / 151<br>(26%)             | 0.042                | 29 / 172<br>(17%)                          | 35 / 132<br>(27%)                              | 0.041                |
| Rest more                            | 67 / 304 (22%)       | 45 / 156<br>(29%)                     | 7 / 22 (32%)                          | 15 / 126<br>(12%)                              | 0.002                | 25 / 153<br>(16%)               | 42 / 151<br>(28%)             | 0.016                | 33 / 172<br>(19%)                          | 34 / 132<br>(26%)                              | 0.2                  |
| Sleepy or drowsy                     | 33 / 304 (11%)       | 18 / 156<br>(12%)                     | 3 / 22 (14%)                          | 12 / 126<br>(9.5%)                             | 0.8                  | 15 / 153<br>(9.8%)              | 18 / 151<br>(12%)             | 0.6                  | 10 / 172<br>(5.8%)                         | 23 / 132<br>(17%)                              | 0.001                |
| Problems starting<br>things          | 18 / 305 (5.9%)      | 9 / 157 (5.7%)                        | 1 / 22 (4.5%)                         | 8 / 126<br>(6.3%)                              | >0.9                 | 8 / 154<br>(5.2%)               | 10 / 151<br>(6.6%)            | 0.6                  | 7 / 173<br>(4.0%)                          | 11 / 132<br>(8.3%)                             | 0.12                 |
| Lack energy                          | 68 / 306 (22%)       | 43 / 157<br>(27%)                     | 7 / 22 (32%)                          | 18 / 127<br>(14%)                              | 0.015                | 28 / 155<br>(18%)               | 40 / 151<br>(26%)             | 0.076                | 32 / 174<br>(18%)                          | 36 / 132<br>(27%)                              | 0.064                |
| Less strength in your<br>muscles     | 63 / 306 (21%)       | 37 / 157<br>(24%)                     | 8 / 22 (36%)                          | 18 / 127<br>(14%)                              | 0.025                | 27 / 155<br>(17%)               | 36 / 151<br>(24%)             | 0.2                  | 28 / 174<br>(16%)                          | 35 / 132<br>(27%)                              | 0.026                |
| Feel weak                            | 76 / 306 (25%)       | 47 / 157<br>(30%)                     | 8 / 22 (36%)                          | 21 / 127<br>(17%)                              | 0.015                | 32 / 155<br>(21%)               | 44 / 151<br>(29%)             | 0.086                | 37 / 174<br>(21%)                          | 39 / 132<br>(30%)                              | 0.10                 |
| Difficulties<br>concentrating        | 42 / 304 (14%)       | 25 / 156<br>(16%)                     | 3 / 22 (14%)                          | 14 / 126<br>(11%)                              | 0.5                  | 20 / 153<br>(13%)               | 22 / 151<br>(15%)             | 0.7                  | 17 / 172<br>(9.9%)                         | 25 / 132<br>(19%)                              | 0.023                |
| Slips of the tongue<br>when speaking | 12 / 304 (3.9%)      | 5 / 156 (3.2%)                        | 2 / 22 (9.1%)                         | 5 / 126<br>(4.0%)                              | 0.3                  | 4 / 153<br>(2.6%)               | 8 / 151<br>(5.3%)             | 0.2                  | 5 / 172<br>(2.9%)                          | 7 / 132<br>(5.3%)                              | 0.3                  |
| Difficulty finding the<br>right word | 16 / 304 (5.3%)      | 8 / 156 (5.1%)                        | 3 / 22 (14%)                          | 5 / 126<br>(4.0%)                              | 0.15                 | 8 / 153<br>(5.2%)               | 8 / 151<br>(5.3%)             | >0.9                 | 7 / 172<br>(4.1%)                          | 9 / 132<br>(6.8%)                              | 0.3                  |
| Memory                               | 10 / 303 (3.3%)      | 5 / 156 (3.2%)                        | 2 / 22 (9.1%)                         | 3 / 125<br>(2.4%)                              | 0.2                  | 5 / 153<br>(3.3%)               | 5 / 150<br>(3.3%)             | >0.9                 | 5 / 172<br>(2.9%)                          | 5 / 131<br>(3.8%)                              | 0.8                  |

<sup>1</sup>n / N (%)

<sup>2</sup>Pearson's Chi-squared test; Fisher's exact test

**Table S4.** Neurocognitive issues reported

| Characteristic                                         | All<br>observati<br>ons | By period                                |                                          |                                                |                          | By sex                          |                               |                          | By age group                               |                                                |                      |
|--------------------------------------------------------|-------------------------|------------------------------------------|------------------------------------------|------------------------------------------------|--------------------------|---------------------------------|-------------------------------|--------------------------|--------------------------------------------|------------------------------------------------|----------------------|
|                                                        | N = 658 <sup>1</sup>    | 1 - 5<br>months,<br>N = 353 <sup>1</sup> | 6 - 9<br>months,<br>N = 154 <sup>1</sup> | 12 months<br>and more,<br>N = 151 <sup>1</sup> | p-<br>value <sup>2</sup> | female,<br>N = 337 <sup>1</sup> | male,<br>N = 321 <sup>1</sup> | p-<br>value <sup>3</sup> | below 10<br>years,<br>N = 310 <sup>1</sup> | 10 years and<br>above,<br>N = 348 <sup>1</sup> | p-value <sup>3</sup> |
| Eating                                                 | 70 / 656<br>(11%)       | 44 / 353<br>(12%)                        | 17 / 154<br>(11%)                        | 9 / 149<br>(6.0%)                              | 0.10                     | 34 / 336<br>(10%)               | 36 / 320<br>(11%)             | 0.6                      | 33 / 308<br>(11%)                          | 37 / 348<br>(11%)                              | >0.9                 |
| Sleeping                                               | 92 / 656<br>(14%)       | 56 / 353<br>(16%)                        | 25 / 154<br>(16%)                        | 11 / 149<br>(7.4%)                             | 0.029                    | 52 / 336<br>(15%)               | 40 / 320<br>(12%)             | 0.3                      | 33 / 308<br>(11%)                          | 59 / 348<br>(17%)                              | 0.022                |
| Physical activity                                      | 238 /<br>656<br>(36%)   | 149 / 353<br>(42%)                       | 58 / 154<br>(38%)                        | 31 / 149<br>(21%)                              | <0.001                   | 123 / 336<br>(37%)              | 115 / 320<br>(36%)            | 0.9                      | 86 / 308<br>(28%)                          | 152 / 348<br>(44%)                             | <0.001               |
| More fatigue                                           | 147 /<br>656<br>(22%)   | 97 / 353<br>(27%)                        | 25 / 154<br>(16%)                        | 25 / 149<br>(17%)                              | 0.003                    | 76 / 336<br>(23%)               | 71 / 320<br>(22%)             | 0.9                      | 54 / 308<br>(18%)                          | 93 / 348<br>(27%)                              | 0.005                |
| Time spent with<br>friends in person                   | 180 /<br>615<br>(29%)   | 97 / 329<br>(29%)                        | 53 / 148<br>(36%)                        | 30 / 138<br>(22%)                              | 0.033                    | 90 / 315<br>(29%)               | 90 / 300<br>(30%)             | 0.7                      | 60 / 284<br>(21%)                          | 120 / 331<br>(36%)                             | <0.001               |
| Time spent with<br>friends remotely                    | 72 / 617<br>(12%)       | 41 / 332<br>(12%)                        | 24 / 147<br>(16%)                        | 7 / 138<br>(5.1%)                              | 0.011                    | 32 / 318<br>(10%)               | 40 / 299<br>(13%)             | 0.2                      | 16 / 284<br>(5.6%)                         | 56 / 333<br>(17%)                              | <0.001               |
| Spending time<br>outside                               | 193 /<br>618<br>(31%)   | 106 / 331<br>(32%)                       | 62 / 148<br>(42%)                        | 25 / 139<br>(18%)                              | <0.001                   | 96 / 318<br>(30%)               | 97 / 300<br>(32%)             | 0.6                      | 76 / 287<br>(26%)                          | 117 / 331<br>(35%)                             | 0.018                |
| more screen<br>time for non<br>educational<br>purposes | 127 /<br>613<br>(21%)   | 78 / 329<br>(24%)                        | 36 / 146<br>(25%)                        | 13 / 138<br>(9.4%)                             | <0.001                   | 56 / 315<br>(18%)               | 71 / 298<br>(24%)             | 0.065                    | 40 / 282<br>(14%)                          | 87 / 331<br>(26%)                              | <0.001               |
| Attending school                                       | 99 / 607<br>(16%)       | 59 / 327<br>(18%)                        | 20 / 145<br>(14%)                        | 20 / 135<br>(15%)                              | 0.4                      | 39 / 313<br>(12%)               | 60 / 294<br>(20%)             | 0.008                    | 35 / 277<br>(13%)                          | 64 / 330<br>(19%)                              | 0.025                |

|                                                              |                       |                    |                   |                   |        |                    |                   |      |                    |                    |        |
|--------------------------------------------------------------|-----------------------|--------------------|-------------------|-------------------|--------|--------------------|-------------------|------|--------------------|--------------------|--------|
| Connectedness                                                | 12 / 611<br>(2.0%)    | 5 / 328<br>(1.5%)  | 7 / 146<br>(4.8%) | 0 / 137 (0%)      | 0.009  | 6 / 316<br>(1.9%)  | 6 / 295<br>(2.0%) | >0.9 | 5 / 281<br>(1.8%)  | 7 / 330 (2.1%)     | 0.8    |
| Emotions                                                     | 161 /<br>656<br>(25%) | 86 / 353<br>(24%)  | 51 / 154<br>(33%) | 24 / 149<br>(16%) | 0.003  | 83 / 336<br>(25%)  | 78 / 320<br>(24%) | >0.9 | 53 / 308<br>(17%)  | 108 / 348<br>(31%) | <0.001 |
| Behaviour                                                    | 116 /<br>654<br>(18%) | 59 / 353<br>(17%)  | 33 / 153<br>(22%) | 24 / 148<br>(16%) | 0.4    | 57 / 336<br>(17%)  | 59 / 318<br>(19%) | 0.6  | 60 / 308<br>(19%)  | 56 / 346<br>(16%)  | 0.3    |
| Relationships                                                | 56 / 611<br>(9.2%)    | 21 / 327<br>(6.4%) | 26 / 146<br>(18%) | 9 / 138<br>(6.5%) | <0.001 | 25 / 319<br>(7.8%) | 31 / 292<br>(11%) | 0.2  | 17 / 281<br>(6.0%) | 39 / 330<br>(12%)  | 0.014  |
| <sup>1</sup> n / N (%)                                       |                       |                    |                   |                   |        |                    |                   |      |                    |                    |        |
| <sup>2</sup> Pearson's Chi-squared test; Fisher's exact test |                       |                    |                   |                   |        |                    |                   |      |                    |                    |        |
| <sup>3</sup> Pearson's Chi-squared test                      |                       |                    |                   |                   |        |                    |                   |      |                    |                    |        |

**Table S5.** Wellbeing reported reported

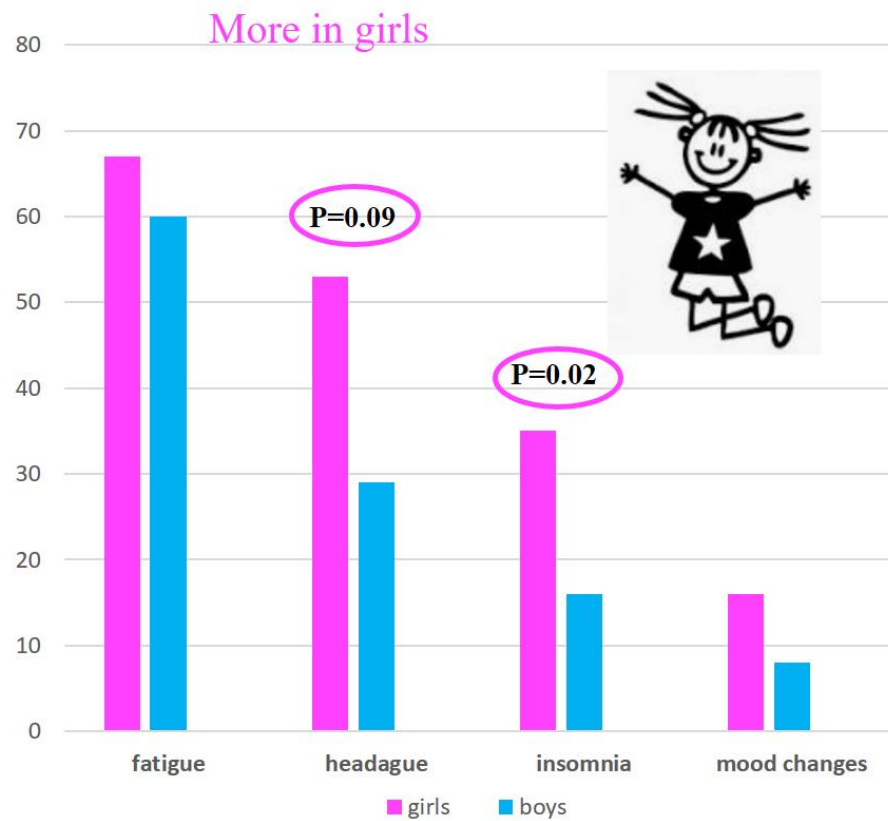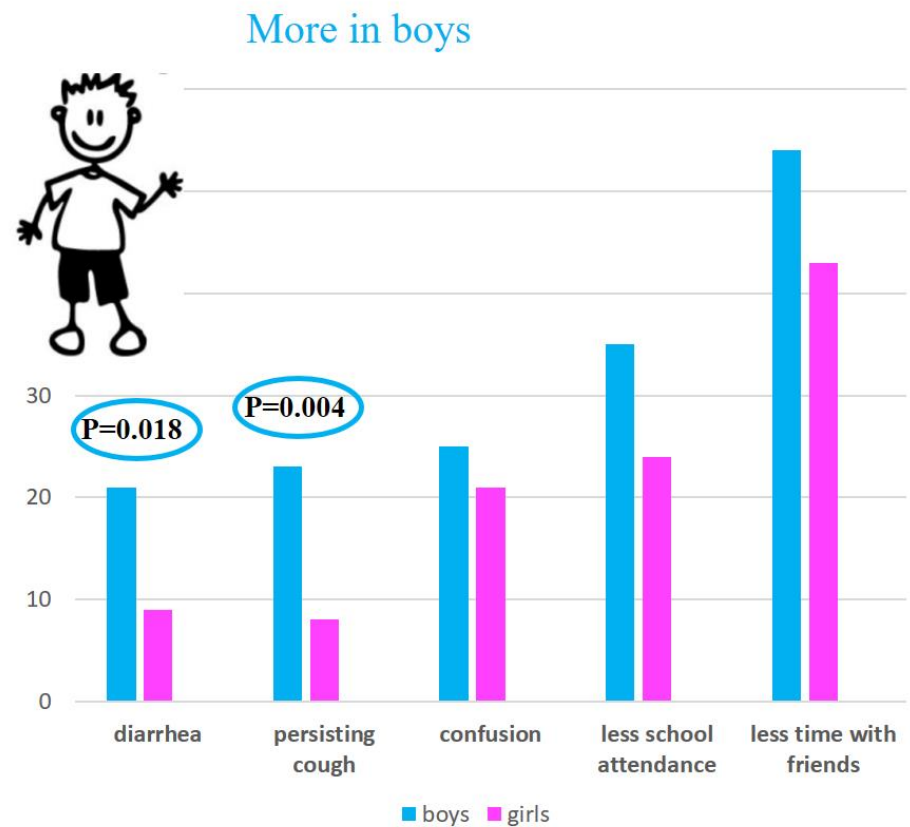

**Supplementary figure S1:** pattern of persisting symptoms more common in girls or boys

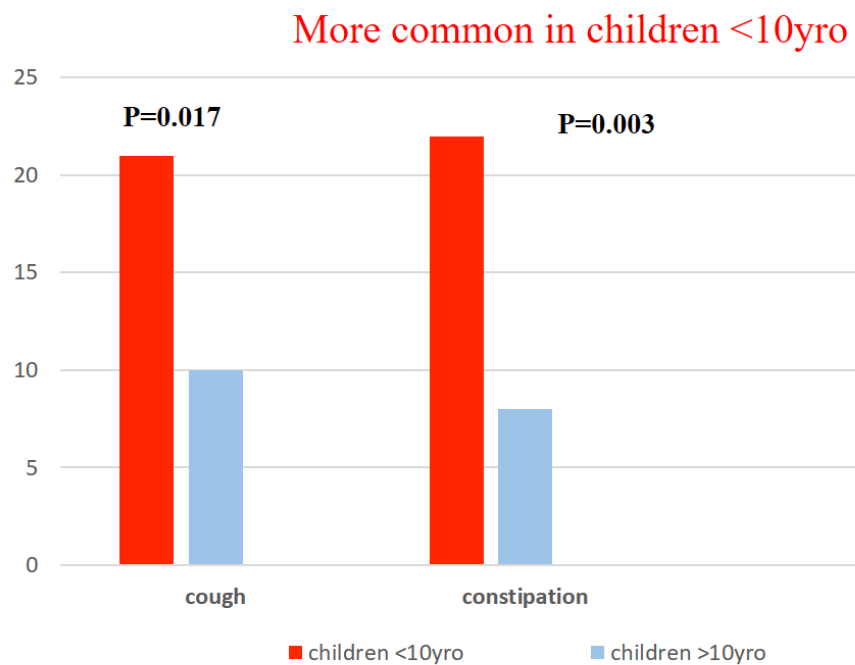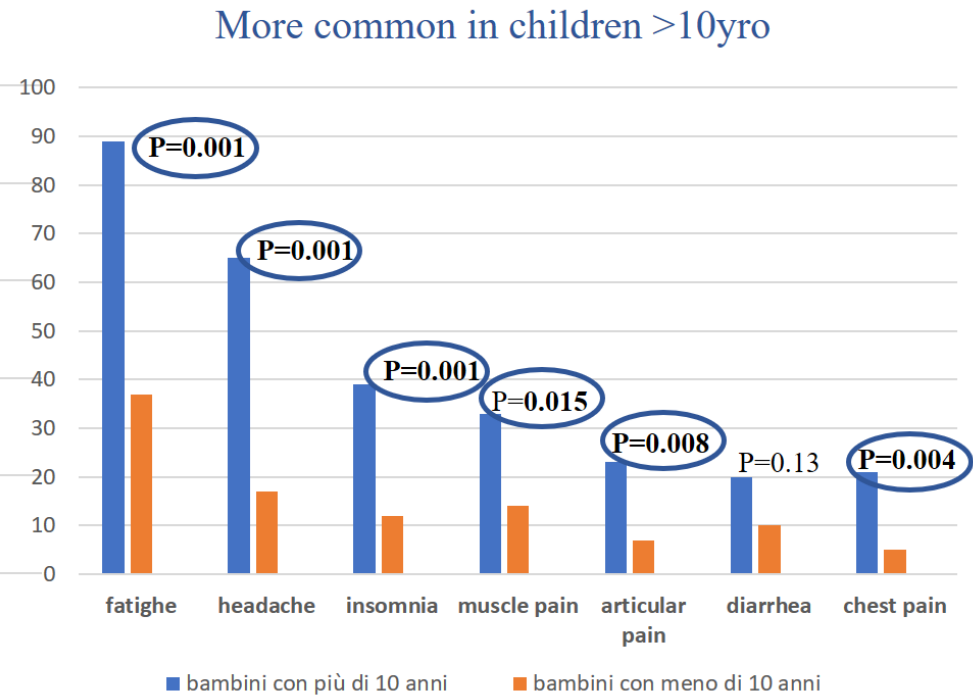

**Supplementary figure S2:** pattern of persisting symptoms more common in children younger or older than 10 years of age  
Supplementary methods

## Annexes

---

COVID-19 Health and Wellbeing **Initial** Follow Up Survey for Children, according to the ISARIC proposal

### PARENT REPORT FOR CHILDREN AND YOUNG PEOPLE

(between 0 and 18 years of age)

SURVEY TIMEPOINT (to be completed by the team before sending or administering the survey): 3m [\_\_\_\_] 6m [\_\_] 12m [\_\_\_\_]  
24m [\_\_] 36m [\_\_]

Survey completed: ☐ Online ☐ Telephone ☐ Clinic led assessment

☐ Mother/female caregiver ☐ Father/male caregiver ☐ Other If *other*, please specify \_\_\_\_\_

#### Your permission to proceed

Thank you for coming this far. Now to take part, please read the statements below, and initial the boxes if you are happy to go ahead.

| PLEASE MARK YOUR INITIALS AGAINST EACH STATEMENT WITH WHICH YOU AGREE:               | <i>Initials:</i> |  |
|--------------------------------------------------------------------------------------|------------------|--|
| I give my consent for the information I provide in this study to be used as advised. |                  |  |



|                                                                                                                                                                                                                                                                                                                                                          |                 |           |
|----------------------------------------------------------------------------------------------------------------------------------------------------------------------------------------------------------------------------------------------------------------------------------------------------------------------------------------------------------|-----------------|-----------|
| <p>I would like to continue to be sent this survey via email, post or to be contacted via telephone follow up every 3 to 6 months for a maximum of 3 years after my child's Covid-19 illness.</p> <p>If yes, please enter your contact details here:<br/> E-mail: _____<br/> _____<br/> Mobile phone number: _____<br/> Home telephone number: _____</p> | <p>YE<br/>S</p> | <p>NO</p> |
| <p>I would like the possibility to be contacted by a nurse, doctor or researcher to discuss my child's Covid-19 illness further.</p> <p>If yes, please enter your contact details here:<br/> Mobile phone number: _____<br/> Home telephone number: _____</p>                                                                                            | <p>YE<br/>S</p> | <p>NO</p> |
| <p>You are completing this survey on behalf of your child, please enter your and their details</p> <p><b>Your child's first name:</b> _____ <b>Surname:</b> _____</p> <p><b>Your first name:</b> _____ <b>Surname:</b> _____</p> <p><b>Town/City of residence:</b> _____ <b>Postcode:</b> _____</p> <p><b>Your signature:</b> _____</p>                  |                 |           |

**Local hospital ID:** \_\_\_\_\_

**1a. About you child****Sex assigned at Birth:** ☐ Male ☐ Female ☐ Prefer not to say**Ethnicity (tick all that apply):** ☐ White ☐ Arab ☐ Black ☐ East Asian ☐ South Asian☐ West Asian ☐ Latin American ☐ Other (specify): \_\_\_\_\_ ☐ Prefer not to say**What is your child's estimated height:** \_\_\_\_\_ (☐ metres ☐ feet/inches) ☐ Not sure**What is your child's current estimated weight:** \_\_\_\_\_ (☐ kg ☐ lbs ☐ stone) ☐ Not sure**What was your child's estimated weight before Covid19 illness?** \_\_\_\_\_ (☐ kg ☐ lbs ☐ stone) ☐ Not sure**How many other members regularly live in your household, including yourself:**

[\_Number\_]

**1b. About your child's Covid-19 illness - all the questions relate to his/her health and wellbeing)****Date you completed the survey (DD/MM/YYYY):**[\_D\_] [\_D\_] / [\_M\_] [\_M\_] / [\_2\_] [\_0\_] [\_Y\_] [\_Y\_] **What is your child date of birth (DD/MM/YYYY):**[\_D\_] [\_D\_] / [\_M\_] [\_M\_] / [\_Y\_] [\_Y\_] [\_Y\_] [\_Y\_] **Approximately, what day did you first notice your child was experiencing symptoms of Covid-19?** [\_D\_] [\_D\_] / [\_M\_] [\_M\_] / [\_2\_] [\_0\_] [\_Y\_] [\_Y\_] **How was your child diagnosed with Covid-19?**

- ☐ Laboratory confirmed (PCR or/and Antibody test)
- ☐ Physician confirmed (no laboratory testing was performed) ☐ Not sure

**Has your child been admitted to hospital due to Covid-19?** ☐ Yes ☐ No*(If the answer is "no", please, move on to the section "2"; if the answer is "yes", please, proceed with the following questions)*

- **Roughly at what date was your child first admitted to hospital?**

[\_D\_] [\_D\_] / [\_M\_] [\_M\_] / [\_2\_] [\_0\_] [\_Y\_] [\_Y\_]

- **Roughly at what date was your child first discharged from hospital?**

[\_D\_] [\_D\_] / [\_M\_] [\_M\_] / [\_2\_] [\_0\_] [\_Y\_] [\_Y\_]

- **Spent any time in the Paediatric Intensive Care Unit (PICU)?** ☐ Yes ☐ No ☐ Not sure

- **Hospital admission or health facility visit after Covid-19 illness?** ☐ Yes ☐ No

If yes, how many times: [\_Number\_]

If yes, specify reason/reasons: \_\_\_\_\_

Name of hospital/hospitals: \_\_\_\_\_

**2a. About your child's emotional wellbeing, social relationships and activities'**

To answer the following questions, please **mark an X** on the lines below that shows your opinion on the question. In each scale, **1 is the least favorable value, 5 is the most favorable value**.

**1. Compared to before the Covid-19 infection, how much is the child now doing the following**  
***If there are changes, please indicate whether you think these are due to the illness itself or to the Covid-19 pandemic (e.g. changes in social activities)***

***Eating***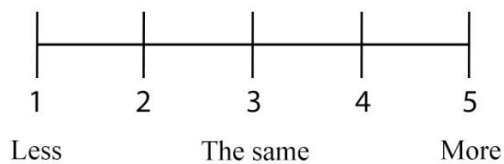

***If there are changes, please indicate whether you think these are due to***

- ☐ *Illness itself* ☐ *Covid-19 pandemic* ☐ *Both* ☐ *Unsure*

***Sleeping***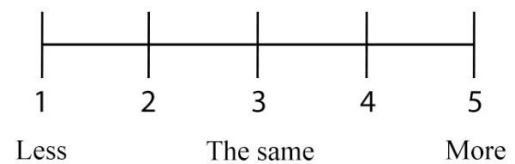

***If there are changes, please indicate whether you think these are due to***

- ☐ *Illness itself* ☐ *Covid-19 pandemic* ☐ *Both*

***Physical activity***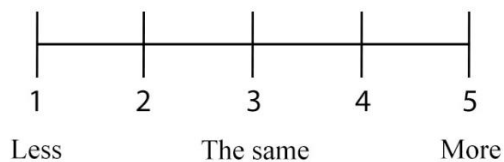

***If there are changes, please indicate whether you think these are due to***

- ☐ *Illness itself* ☐ *Covid-19 pandemic* ☐ *Both* ☐ *Unsure*

***Fatigue***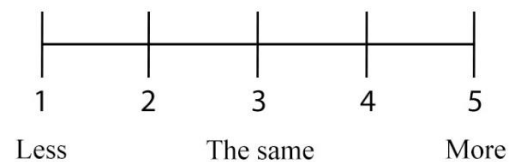

***If there are changes, please indicate whether you think these are due to***

- ☐ *Illness itself* ☐ *Covid-19 pandemic* ☐ *Both*

***Spending time with friends in-person***

***Spending time with friends remotely (e.g., online, social media, texting)***

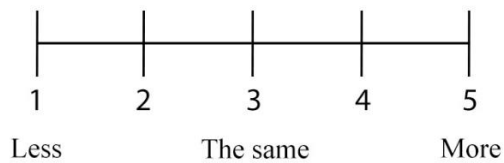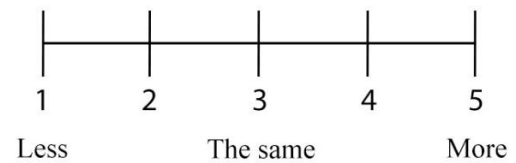

**If there are changes, please indicate whether you think these are due to**

☐ Illness itself ☐ Covid-19 pandemic ☐ Both ☐ Unsure

**If there are changes, please indicate whether you think these are due to**

☐ Illness itself ☐ Covid-19 pandemic ☐ Both ☐

**Spending time outside**

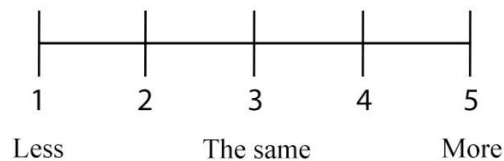

**If there are changes, please indicate whether you think these are due to**

☐ Illness itself ☐ Covid-19 pandemic ☐ Both ☐ Unsure

**Spending time watching TV, playing video/computer games, or using social media for educational purposes, including school work**

**Spending time watching TV, playing video/computer games, or using social media for non-educational**

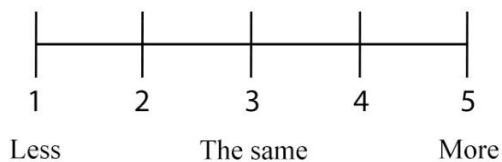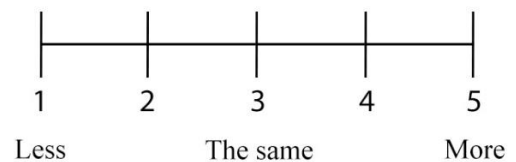

**If there are changes, please indicate whether you think these are due to**

☐ Illness itself ☐ Covid-19 pandemic ☐ Both ☐ Unsure

**If there are changes, please indicate whether you think these are due to**

☐ Illness itself ☐ Covid-19 pandemic ☐ Both

**Attending school**

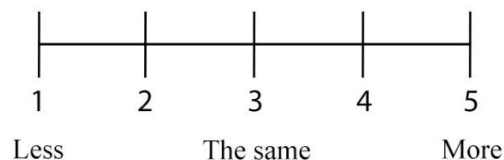

**If there are changes, please indicate whether you think these are due to**

☐ Illness itself ☐ Covid-19 pandemic ☐ Both ☐ Unsure

**2. Compared to before the Covid-19 infection: Have there been changes in your child's CONNECTEDNESS with others since...**

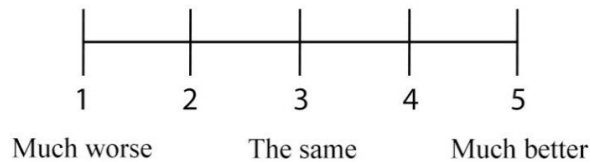

**If there are changes,** please indicate whether you think these are due to

☐ Illness itself ☐ Covid-19 pandemic ☐ Both ☐ Unsure

**3. Compared to before the Covid-19 infection have there been any changes in your child's EMOTIONS?**

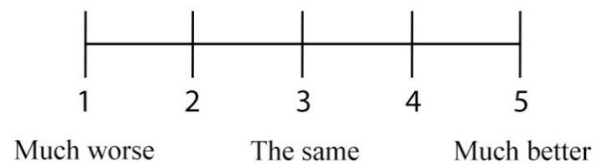

**If there are changes,** please indicate whether you think these are due to

☐ Illness itself ☐ Covid-19 pandemic ☐ Both ☐ Unsure

**4. Compared to before the Covid-19 infection have there been any changes in your child's BEHAVIOUR?**

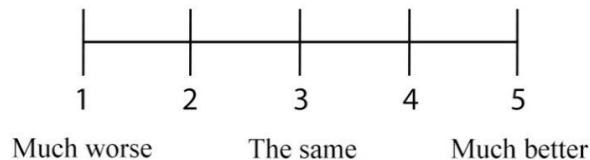

**If there are changes,** please indicate whether you think these are due to

☐ Illness itself ☐ Covid-19 pandemic ☐ Both ☐ Unsure

**5. Compared to before the Covid-19 infection have there been any changes in your child's RELATIONSHIPS, in how they get on with others?**

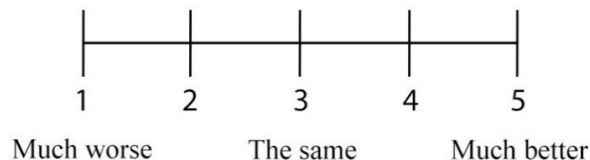

**If there are changes,** please indicate whether you think these are due to

☐ Illness itself ☐ Covid-19 pandemic ☐ Both ☐ Unsure

**6. Have you asked for help from a health professional because of Covid-19 consequences to your child's EMOTIONS, BEHAVIOUR OR RELATIONSHIPS?** ☐ Yes ☐ No

If so, who did you ask help from \_\_\_\_\_

**If you have replied MUCH WORSE to any of the above OR YOU HAVE ASKED FOR HELP for these problems:**

- Do the difficulties upset or distress your child?  
☐ Not at all ☐ Only a little ☐ Quite a lot ☐ A great deal

- Do the difficulties interfere with your child's everyday life in the following areas?  
 Home Life ☐ Not at all ☐ Only a little ☐ Quite a lot ☐ A great deal  
 Friendships ☐ Not at all ☐ Only a little ☐ Quite a lot ☐ A great deal  
 Classroom Learning ☐ Not at all ☐ Only a little ☐ Quite a lot ☐ A great deal  
 Leisure Activities ☐ Not at all ☐ Only a little ☐ Quite a lot ☐ A great deal

- Do the difficulties put a burden on you or the family as a whole?  
☐ Not at all ☐ Only a little ☐ Quite a lot ☐ A great deal

## 7. What is the current situation in your town/city/region on lockdown measures...?

- ☐ Closing of schools and kindergartens
- ☐ Closing of non-essential shops (shops and stores apart from food, doctors and drug stores)
- ☐ Closing of non-essential production
- ☐ Cancellation of recreational venues and closing of public places
- ☐ Constraining meeting friends
- ☐ Curfews
- ☐ Stay-at-home orders and/or total movement control

## 2b. About your child's current state of health

Has your child RECEIVED TREATMENT for any of the following chronic medical conditions prior to the Covid-19 infection?

|                                                                                                               | Yes                      | No                       | Unknown                  |
|---------------------------------------------------------------------------------------------------------------|--------------------------|--------------------------|--------------------------|
| Prematurity ( <i>baby born &lt;37 weeks</i> )                                                                 | <input type="checkbox"/> | <input type="checkbox"/> | <input type="checkbox"/> |
| Neurological ( <i>pertaining to the nervous system</i> )                                                      | <input type="checkbox"/> | <input type="checkbox"/> | <input type="checkbox"/> |
| Neurodisability                                                                                               | <input type="checkbox"/> | <input type="checkbox"/> | <input type="checkbox"/> |
| Heart diseases                                                                                                | <input type="checkbox"/> | <input type="checkbox"/> | <input type="checkbox"/> |
| Respiratory diseases (not including asthma)                                                                   | <input type="checkbox"/> | <input type="checkbox"/> | <input type="checkbox"/> |
| Asthma (doctor's diagnosed)                                                                                   | <input type="checkbox"/> | <input type="checkbox"/> | <input type="checkbox"/> |
| Allergic rhinitis/hay fever                                                                                   | <input type="checkbox"/> | <input type="checkbox"/> | <input type="checkbox"/> |
| Food allergy                                                                                                  | <input type="checkbox"/> | <input type="checkbox"/> | <input type="checkbox"/> |
| Atopic dermatitis/Eczema                                                                                      | <input type="checkbox"/> | <input type="checkbox"/> | <input type="checkbox"/> |
| Skin problems (not including eczema)                                                                          | <input type="checkbox"/> | <input type="checkbox"/> | <input type="checkbox"/> |
| Gut problems                                                                                                  | <input type="checkbox"/> | <input type="checkbox"/> | <input type="checkbox"/> |
| Haematology ( <i>blood diseases</i> )                                                                         | <input type="checkbox"/> | <input type="checkbox"/> | <input type="checkbox"/> |
| Oncology ( <i>cancer or other progressively enlarging and spreading tumor</i> )                               | <input type="checkbox"/> | <input type="checkbox"/> | <input type="checkbox"/> |
| Immune system diseases                                                                                        | <input type="checkbox"/> | <input type="checkbox"/> | <input type="checkbox"/> |
| Genetic conditions                                                                                            | <input type="checkbox"/> | <input type="checkbox"/> | <input type="checkbox"/> |
| Diabetes                                                                                                      | <input type="checkbox"/> | <input type="checkbox"/> | <input type="checkbox"/> |
| Endocrine (not diabetes)                                                                                      | <input type="checkbox"/> | <input type="checkbox"/> | <input type="checkbox"/> |
| Renal/Kidney problems                                                                                         | <input type="checkbox"/> | <input type="checkbox"/> | <input type="checkbox"/> |
| Excessive weight and obesity                                                                                  | <input type="checkbox"/> | <input type="checkbox"/> | <input type="checkbox"/> |
| Malnutrition ( <i>deficiencies, excesses, or imbalances in a person's intake of energy and/or nutrients</i> ) | <input type="checkbox"/> | <input type="checkbox"/> | <input type="checkbox"/> |





**How much do you agree with the following statement?**

"My child has fully recovered from Covid-19"

Please **mark an X** on the line below that shows your opinion on the question as of **TODAY**

|                   |   |   |         |   |   |   |                |   |   |    |
|-------------------|---|---|---------|---|---|---|----------------|---|---|----|
| 0                 | 1 | 2 | 3       | 4 | 5 | 6 | 7              | 8 | 9 | 10 |
| Strongly disagree |   |   | Neutral |   |   |   | Strongly agree |   |   |    |

**3. Since having Covid-19, has your child been diagnosed with any of the following?**

|                                                   |                              |                             |                                                  |                              |                             |
|---------------------------------------------------|------------------------------|-----------------------------|--------------------------------------------------|------------------------------|-----------------------------|
| Multisystem inflammatory syndrome                 | <input type="checkbox"/> Yes | <input type="checkbox"/> No | Shock / Toxic shock syndrome                     | <input type="checkbox"/> Yes | <input type="checkbox"/> No |
| Pulmonary embolism<br>(PE, "Clot in lung")        | <input type="checkbox"/> Yes | <input type="checkbox"/> No | Coagulopathy<br>(excessive bleeding or clotting) | <input type="checkbox"/> Yes | <input type="checkbox"/> No |
| Kawasaki disease                                  | <input type="checkbox"/> Yes | <input type="checkbox"/> No | Kidney problems                                  | <input type="checkbox"/> Yes | <input type="checkbox"/> No |
| Respiratory failure                               | <input type="checkbox"/> Yes | <input type="checkbox"/> No | Type 1 Diabetes                                  | <input type="checkbox"/> Yes | <input type="checkbox"/> No |
| Myocarditis<br>(inflammation of the heart muscle) | <input type="checkbox"/> Yes | <input type="checkbox"/> No | Type 2 Diabetes                                  | <input type="checkbox"/> Yes | <input type="checkbox"/> No |
| Asthma                                            | <input type="checkbox"/> Yes | <input type="checkbox"/> No | Intussusception                                  | <input type="checkbox"/> Yes | <input type="checkbox"/> No |

Other condition (please specify)?

\_\_\_\_\_

**4. Within the last seven days, have you had any of these symptoms, which were NOT present prior to Covid-19?  
If yes, please indicate duration of the symptom(-s).**

| <b>Respiratory problems</b>           | <b>Yes/No</b>                                            | <b>If yes</b> , what is the duration of symptoms                                                                                                                       |
|---------------------------------------|----------------------------------------------------------|------------------------------------------------------------------------------------------------------------------------------------------------------------------------|
| Nasal congestion / rhinorrhea         | <input type="checkbox"/> Yes <input type="checkbox"/> No | <input type="checkbox"/> less than 1 month <input type="checkbox"/> 1-3 months <input type="checkbox"/> over 3 to 6 months <input type="checkbox"/> more than 6 months |
| Difficulty breathing /chest tightness | <input type="checkbox"/> Yes <input type="checkbox"/> No | <input type="checkbox"/> less than 1 month <input type="checkbox"/> 1-3 months <input type="checkbox"/> over 3 to 6 months <input type="checkbox"/> more than 6 months |
| Pain on breathing                     | <input type="checkbox"/> Yes <input type="checkbox"/> No | <input type="checkbox"/> less than 1 month <input type="checkbox"/> 1-3 months <input type="checkbox"/> over 3 to 6 months <input type="checkbox"/> more than 6 months |
| Chest pain                            | <input type="checkbox"/> Yes <input type="checkbox"/> No | <input type="checkbox"/> less than 1 month <input type="checkbox"/> 1-3 months <input type="checkbox"/> over 3 to 6 months <input type="checkbox"/> more than 6 months |
| Persistent cough                      | <input type="checkbox"/> Yes <input type="checkbox"/> No | <input type="checkbox"/> less than 1 month <input type="checkbox"/> 1-3 months <input type="checkbox"/> over 3 to 6 months <input type="checkbox"/> more than 6 months |

*If yes, ☐ dry cough ☐ with phlegm*

| <b>Musculoskeletal problems</b>       | <b>Yes/No</b>                                            | <b>If yes</b> , what is the duration of symptoms                                                                                                                       |
|---------------------------------------|----------------------------------------------------------|------------------------------------------------------------------------------------------------------------------------------------------------------------------------|
| Cannot fully move or control movement | <input type="checkbox"/> Yes <input type="checkbox"/> No | <input type="checkbox"/> less than 1 month <input type="checkbox"/> 1-3 months <input type="checkbox"/> over 3 to 6 months <input type="checkbox"/> more than 6 months |
| Problems with balance                 | <input type="checkbox"/> Yes <input type="checkbox"/> No | <input type="checkbox"/> less than 1 month <input type="checkbox"/> 1-3 months <input type="checkbox"/> over 3 to 6 months <input type="checkbox"/> more than 6 months |
| Persistent muscle pain                | <input type="checkbox"/> Yes <input type="checkbox"/> No | <input type="checkbox"/> less than 1 month <input type="checkbox"/> 1-3 months <input type="checkbox"/> over 3 to 6 months <input type="checkbox"/> more than 6 months |
| Joint pain or swelling                | <input type="checkbox"/> Yes <input type="checkbox"/> No | <input type="checkbox"/> less than 1 month <input type="checkbox"/> 1-3 months <input type="checkbox"/> over 3 to 6 months <input type="checkbox"/> more than 6 months |

| <b>Neurological problems</b> | <b>Yes/No</b>                                            | <b>If yes</b> , what is the duration of symptoms                                                                                                                       |
|------------------------------|----------------------------------------------------------|------------------------------------------------------------------------------------------------------------------------------------------------------------------------|
| Headache                     | <input type="checkbox"/> Yes <input type="checkbox"/> No | <input type="checkbox"/> less than 1 month <input type="checkbox"/> 1-3 months <input type="checkbox"/> over 3 to 6 months <input type="checkbox"/> more than 6 months |
| Dizziness/ light headedness  | <input type="checkbox"/> Yes <input type="checkbox"/> No | <input type="checkbox"/> less than 1 month <input type="checkbox"/> 1-3 months <input type="checkbox"/> over 3 to 6 months <input type="checkbox"/> more than 6 months |
| Fainting/ blackouts          | <input type="checkbox"/> Yes <input type="checkbox"/> No | <input type="checkbox"/> less than 1 month <input type="checkbox"/> 1-3 months <input type="checkbox"/> over 3 to 6 months <input type="checkbox"/> more than 6 months |
| Double vision/blurred vision | <input type="checkbox"/> Yes <input type="checkbox"/> No | <input type="checkbox"/> less than 1 month <input type="checkbox"/> 1-3 months <input type="checkbox"/> over 3 to 6 months <input type="checkbox"/> more than 6 months |

**PARTICIPANT IDENTIFICATION# :**

|                                                                                  |                                                          |                                                                                                                                                                        |
|----------------------------------------------------------------------------------|----------------------------------------------------------|------------------------------------------------------------------------------------------------------------------------------------------------------------------------|
| Alternated smell                                                                 | <input type="checkbox"/> Yes <input type="checkbox"/> No | <input type="checkbox"/> less than 1 month <input type="checkbox"/> 1-3 months <input type="checkbox"/> over 3 to 6 months <input type="checkbox"/> more than 6 months |
| Loss of smell                                                                    | <input type="checkbox"/> Yes <input type="checkbox"/> No | <input type="checkbox"/> less than 1 month <input type="checkbox"/> 1-3 months <input type="checkbox"/> over 3 to 6 months <input type="checkbox"/> more than 6 months |
| Alternated taste                                                                 | <input type="checkbox"/> Yes <input type="checkbox"/> No | <input type="checkbox"/> less than 1 month <input type="checkbox"/> 1-3 months <input type="checkbox"/> over 3 to 6 months <input type="checkbox"/> more than 6 months |
| Loss of taste                                                                    | <input type="checkbox"/> Yes <input type="checkbox"/> No | <input type="checkbox"/> less than 1 month <input type="checkbox"/> 1-3 months <input type="checkbox"/> over 3 to 6 months <input type="checkbox"/> more than 6 months |
| Tremor/shakiness                                                                 | <input type="checkbox"/> Yes <input type="checkbox"/> No | <input type="checkbox"/> less than 1 month <input type="checkbox"/> 1-3 months <input type="checkbox"/> over 3 to 6 months <input type="checkbox"/> more than 6 months |
| Tingling feeling/ "pins and needles"                                             | <input type="checkbox"/> Yes <input type="checkbox"/> No | <input type="checkbox"/> less than 1 month <input type="checkbox"/> 1-3 months <input type="checkbox"/> over 3 to 6 months <input type="checkbox"/> more than 6 months |
| Seizures/fits                                                                    | <input type="checkbox"/> Yes <input type="checkbox"/> No | <input type="checkbox"/> less than 1 month <input type="checkbox"/> 1-3 months <input type="checkbox"/> over 3 to 6 months <input type="checkbox"/> more than 6 months |
| Confusion/lack of concentration                                                  | <input type="checkbox"/> Yes <input type="checkbox"/> No | <input type="checkbox"/> less than 1 month <input type="checkbox"/> 1-3 months <input type="checkbox"/> over 3 to 6 months <input type="checkbox"/> more than 6 months |
| Problems speaking or communicating                                               | <input type="checkbox"/> Yes <input type="checkbox"/> No | <input type="checkbox"/> less than 1 month <input type="checkbox"/> 1-3 months <input type="checkbox"/> over 3 to 6 months <input type="checkbox"/> more than 6 months |
| Insomnia ( <i>hard to fall asleep, hard to stay asleep</i> )                     | <input type="checkbox"/> Yes <input type="checkbox"/> No | <input type="checkbox"/> less than 1 month <input type="checkbox"/> 1-3 months <input type="checkbox"/> over 3 to 6 months <input type="checkbox"/> more than 6 months |
| Hypersomnia ( <i>excessive daytime sleepiness or prolonged nighttime sleep</i> ) | <input type="checkbox"/> Yes <input type="checkbox"/> No | <input type="checkbox"/> less than 1 month <input type="checkbox"/> 1-3 months <input type="checkbox"/> over 3 to 6 months <input type="checkbox"/> more than 6 months |
| <b>Fatigue</b>                                                                   | <input type="checkbox"/> Yes <input type="checkbox"/> No | <input type="checkbox"/> less than 1 month <input type="checkbox"/> 1-3 months <input type="checkbox"/> over 3 to 6 months <input type="checkbox"/> more than 6 months |
| <b>Gastrointestinal problems</b>                                                 | <b>Yes/No</b>                                            | <b>If yes</b> , what is the duration of symptoms                                                                                                                       |
| Weight loss                                                                      | <input type="checkbox"/> Yes <input type="checkbox"/> No | <input type="checkbox"/> less than 1 month <input type="checkbox"/> 1-3 months <input type="checkbox"/> over 3 to 6 months <input type="checkbox"/> more than 6 months |
| Problems swallowing or chewing                                                   | <input type="checkbox"/> Yes <input type="checkbox"/> No | <input type="checkbox"/> less than 1 month <input type="checkbox"/> 1-3 months <input type="checkbox"/> over 3 to 6 months <input type="checkbox"/> more than 6 months |
| Poor appetite                                                                    | <input type="checkbox"/> Yes <input type="checkbox"/> No | <input type="checkbox"/> less than 1 month <input type="checkbox"/> 1-3 months <input type="checkbox"/> over 3 to 6 months <input type="checkbox"/> more than 6 months |
| Diarrhea                                                                         | <input type="checkbox"/> Yes <input type="checkbox"/> No | <input type="checkbox"/> less than 1 month <input type="checkbox"/> 1-3 months <input type="checkbox"/> over 3 to 6 months <input type="checkbox"/> more than 6 months |
| Stomach/ abdominal pain                                                          | <input type="checkbox"/> Yes <input type="checkbox"/> No | <input type="checkbox"/> less than 1 month <input type="checkbox"/> 1-3 months <input type="checkbox"/> over 3 to 6 months <input type="checkbox"/> more than 6 months |
| Feeling nauseous                                                                 | <input type="checkbox"/> Yes <input type="checkbox"/> No | <input type="checkbox"/> less than 1 month <input type="checkbox"/> 1-3 months <input type="checkbox"/> over 3 to 6 months <input type="checkbox"/> more than 6 months |

**PARTICIPANT IDENTIFICATION# :**                     

|                        |                                                          |                                                                                                                                                                        |
|------------------------|----------------------------------------------------------|------------------------------------------------------------------------------------------------------------------------------------------------------------------------|
| Feeling sick/ vomiting | <input type="checkbox"/> Yes <input type="checkbox"/> No | <input type="checkbox"/> less than 1 month <input type="checkbox"/> 1-3 months <input type="checkbox"/> over 3 to 6 months <input type="checkbox"/> more than 6 months |
| Constipation           | <input type="checkbox"/> Yes <input type="checkbox"/> No | <input type="checkbox"/> less than 1 month <input type="checkbox"/> 1-3 months <input type="checkbox"/> over 3 to 6 months <input type="checkbox"/> more than 6 months |

|                              |                                                          |                                                                                                                                                                        |
|------------------------------|----------------------------------------------------------|------------------------------------------------------------------------------------------------------------------------------------------------------------------------|
| <b>Dermatologic problems</b> | <b>Yes/No</b>                                            | <b><u>If yes</u></b> , what is the duration of symptoms                                                                                                                |
| Bilateral conjunctivitis     | <input type="checkbox"/> Yes <input type="checkbox"/> No | <input type="checkbox"/> less than 1 month <input type="checkbox"/> 1-3 months <input type="checkbox"/> over 3 to 6 months <input type="checkbox"/> more than 6 months |

*If yes, ☐ purulent ☐ non-purulent*

|                                       |                                                          |                                                                                                                                                                        |
|---------------------------------------|----------------------------------------------------------|------------------------------------------------------------------------------------------------------------------------------------------------------------------------|
| Lumps or rashes (purple/pink) on toes | <input type="checkbox"/> Yes <input type="checkbox"/> No | <input type="checkbox"/> less than 1 month <input type="checkbox"/> 1-3 months <input type="checkbox"/> over 3 to 6 months <input type="checkbox"/> more than 6 months |
|---------------------------------------|----------------------------------------------------------|------------------------------------------------------------------------------------------------------------------------------------------------------------------------|

|           |                                                          |                                                                                                                                                                        |
|-----------|----------------------------------------------------------|------------------------------------------------------------------------------------------------------------------------------------------------------------------------|
| Skin rash | <input type="checkbox"/> Yes <input type="checkbox"/> No | <input type="checkbox"/> less than 1 month <input type="checkbox"/> 1-3 months <input type="checkbox"/> over 3 to 6 months <input type="checkbox"/> more than 6 months |
|-----------|----------------------------------------------------------|------------------------------------------------------------------------------------------------------------------------------------------------------------------------|

*If yes, tick all body areas that apply*

|      |                                                          |                                                                                                                                                                        |
|------|----------------------------------------------------------|------------------------------------------------------------------------------------------------------------------------------------------------------------------------|
| Face | <input type="checkbox"/> Yes <input type="checkbox"/> No | <input type="checkbox"/> less than 1 month <input type="checkbox"/> 1-3 months <input type="checkbox"/> over 3 to 6 months <input type="checkbox"/> more than 6 months |
|------|----------------------------------------------------------|------------------------------------------------------------------------------------------------------------------------------------------------------------------------|

|                         |                                                          |                                                                                                                                                                        |
|-------------------------|----------------------------------------------------------|------------------------------------------------------------------------------------------------------------------------------------------------------------------------|
| Trunk (stomach or back) | <input type="checkbox"/> Yes <input type="checkbox"/> No | <input type="checkbox"/> less than 1 month <input type="checkbox"/> 1-3 months <input type="checkbox"/> over 3 to 6 months <input type="checkbox"/> more than 6 months |
|-------------------------|----------------------------------------------------------|------------------------------------------------------------------------------------------------------------------------------------------------------------------------|

|      |                                                          |                                                                                                                                                                        |
|------|----------------------------------------------------------|------------------------------------------------------------------------------------------------------------------------------------------------------------------------|
| Arms | <input type="checkbox"/> Yes <input type="checkbox"/> No | <input type="checkbox"/> less than 1 month <input type="checkbox"/> 1-3 months <input type="checkbox"/> over 3 to 6 months <input type="checkbox"/> more than 6 months |
|------|----------------------------------------------------------|------------------------------------------------------------------------------------------------------------------------------------------------------------------------|

|      |                                                          |                                                                                                                                                                        |
|------|----------------------------------------------------------|------------------------------------------------------------------------------------------------------------------------------------------------------------------------|
| Legs | <input type="checkbox"/> Yes <input type="checkbox"/> No | <input type="checkbox"/> less than 1 month <input type="checkbox"/> 1-3 months <input type="checkbox"/> over 3 to 6 months <input type="checkbox"/> more than 6 months |
|------|----------------------------------------------------------|------------------------------------------------------------------------------------------------------------------------------------------------------------------------|

|          |                                                          |                                                                                                                                                                        |
|----------|----------------------------------------------------------|------------------------------------------------------------------------------------------------------------------------------------------------------------------------|
| Buttocks | <input type="checkbox"/> Yes <input type="checkbox"/> No | <input type="checkbox"/> less than 1 month <input type="checkbox"/> 1-3 months <input type="checkbox"/> over 3 to 6 months <input type="checkbox"/> more than 6 months |
|----------|----------------------------------------------------------|------------------------------------------------------------------------------------------------------------------------------------------------------------------------|

|      |                                                          |                                                                                                                                                                        |
|------|----------------------------------------------------------|------------------------------------------------------------------------------------------------------------------------------------------------------------------------|
| Toes | <input type="checkbox"/> Yes <input type="checkbox"/> No | <input type="checkbox"/> less than 1 month <input type="checkbox"/> 1-3 months <input type="checkbox"/> over 3 to 6 months <input type="checkbox"/> more than 6 months |
|------|----------------------------------------------------------|------------------------------------------------------------------------------------------------------------------------------------------------------------------------|

|         |                                                          |                                                                                                                                                                        |
|---------|----------------------------------------------------------|------------------------------------------------------------------------------------------------------------------------------------------------------------------------|
| Fingers | <input type="checkbox"/> Yes <input type="checkbox"/> No | <input type="checkbox"/> less than 1 month <input type="checkbox"/> 1-3 months <input type="checkbox"/> over 3 to 6 months <input type="checkbox"/> more than 6 months |
|---------|----------------------------------------------------------|------------------------------------------------------------------------------------------------------------------------------------------------------------------------|

|                     |                                                          |                                                                                                                                                                        |
|---------------------|----------------------------------------------------------|------------------------------------------------------------------------------------------------------------------------------------------------------------------------|
| Accompanied by itch | <input type="checkbox"/> Yes <input type="checkbox"/> No | <input type="checkbox"/> less than 1 month <input type="checkbox"/> 1-3 months <input type="checkbox"/> over 3 to 6 months <input type="checkbox"/> more than 6 months |
|---------------------|----------------------------------------------------------|------------------------------------------------------------------------------------------------------------------------------------------------------------------------|

|                                                       |                                                          |                                                                                                                                                                        |
|-------------------------------------------------------|----------------------------------------------------------|------------------------------------------------------------------------------------------------------------------------------------------------------------------------|
| <b>Cardiovascular problems</b>                        | <b>Yes/No</b>                                            | <b><u>If yes</u></b> , what is the duration of symptoms                                                                                                                |
| Palpitations (heart racing)                           | <input type="checkbox"/> Yes <input type="checkbox"/> No | <input type="checkbox"/> less than 1 month <input type="checkbox"/> 1-3 months <input type="checkbox"/> over 3 to 6 months <input type="checkbox"/> more than 6 months |
| Variations in heart rate (tachycardia or bradycardia) | <input type="checkbox"/> Yes <input type="checkbox"/> No | <input type="checkbox"/> less than 1 month <input type="checkbox"/> 1-3 months <input type="checkbox"/> over 3 to 6 months <input type="checkbox"/> more than 6 months |
| Bleeding                                              | <input type="checkbox"/> Yes <input type="checkbox"/> No | <input type="checkbox"/> less than 1 month <input type="checkbox"/> 1-3 months <input type="checkbox"/> over 3 to 6 months <input type="checkbox"/> more than 6 months |

*If yes, specify bleeding site:*

PARTICIPANT IDENTIFICATION# : [ ][ ][ ][ ][ ]

**Genitourinary problems**

**Yes/No**

**If yes**, what is the duration of symptoms

**If yes**,  
what is  
the  
duration  
of  
symptoms

Urination problems

☐ Yes ☐ No

☐ less than 1 month ☐ 1-3 months ☐ over 3 to 6 months ☐ more than 6 months

Changes in menstruation,  
if settled before Covid-19

☐ Yes ☐ No

☐ Not applicable

☐ less than 1 month ☐ 1-3 months ☐ over 3 to 6 months ☐ more than 6 months

If your child had experienced/is experiencing any **other NEW symptoms** that were not covered by the tables above, please, specify them here.  
Please also indicate how long did these symptoms last (eg days, weeks, months or they are ongoing). **When did these symptoms start:**

---

PARTICIPANT IDENTIFICATION# : [ ][ ][ ][ ][ ]

We would like to know how good or bad your child's health was  
**BEFORE COVID-19** and is **TODAY**

This scale is numbered from 0 to 100%  
with **100% meaning the best health** you can imagine  
**0% means the worst health** you can imagine.

Please **write the number in the box below each scale** to indicate how good or bad your child's  
health was **BEFORE COVID-19** and is **TODAY**.

|                      |                      |
|----------------------|----------------------|
| 100                  | 100                  |
| 95                   | 95                   |
| 90                   | 90                   |
| 85                   | 85                   |
| 80                   | 80                   |
| 75                   | 75                   |
| 70                   | 70                   |
| 65                   | 65                   |
| 60                   | 60                   |
| 55                   | 55                   |
| 50                   | 50                   |
| 45                   | 45                   |
| 40                   | 40                   |
| 35                   | 35                   |
| 30                   | 30                   |
| 25                   | 25                   |
| 20                   | 20                   |
| 15                   | 15                   |
| 10                   | 10                   |
| 5                    | 5                    |
| 0                    | 0                    |
| Before COVID         | Today                |
| <input type="text"/> | <input type="text"/> |

**Has your child been vaccinated in accordance with the national vaccination schedule?**

☐ Yes, vaccinated up to date ☐ Yes, but some vaccines were missed ☐ No, I avoid vaccination for my child

**PARTICIPANT IDENTIFICATION# :** [ ][ ][ ][ ][ ]

Please provide an approximate date of your child's latest vaccination? [D ][D ]/[M ][M ]/[2 ][0 ][Y ][Y ]

Please, specify what was the vaccine: \_\_\_\_\_ ☐ I do not remember

**I trust information I receive about shots?**

☐ Not at all ☐ Only a little ☐ Quite a lot ☐ A great deal

**How concerned are you that any of the childhood shots might not be safe?**

☐ Not at all ☐ Only a little ☐ Quite a lot ☐ A great deal

**Has your child been vaccinated with vaccine against Covid-19?**

☐ Yes ☐ No ☐ Not sure

**If no**, would you like to vaccinate your child against Covid-19 in the future?

☐ Yes ☐ No ☐ Not sure

**I trust information I receive Covid-19 vaccination?**

☐ Not at all ☐ Only a little ☐ Quite a lot ☐ A great deal

**How concerned are you that Covid-19 vaccination might not be safe?**

☐ Not at all ☐ Only a little ☐ Quite a lot ☐ A great deal

**Please let us know of any further comments about the child's illness, the pandemic, lockdown and/or any sequelae.**

\_\_\_\_\_

PARTICIPANT IDENTIFICATION# :

|                                 |
|---------------------------------|
|                                 |
|                                 |
| <b>End of survey</b>            |
| <b>Thank you for your time!</b> |
